# Supplementary material for: Effects of Trichoderma asperellum 6S-2 on Apple Tree Growth and Replanted Soil Microbial Environment
Source: MDPI journal article supplement (doi:10.3390/jof8010063), 2022-01-07
Supplement: s1 [file s1]

## Supplementary

**Table S1.** Physical and chemical properties of soils from four apple orchards.

| Sites     | NH <sub>4</sub> -N<br>(mg·kg <sup>-1</sup> ) | NO <sub>3</sub> -N<br>(mg·kg <sup>-1</sup> ) | AP<br>(mg·kg <sup>-1</sup> ) | AK<br>(mg·kg <sup>-1</sup> ) | SOM<br>(g·kg <sup>-1</sup> ) | pH   | Soil<br>Texture |
|-----------|----------------------------------------------|----------------------------------------------|------------------------------|------------------------------|------------------------------|------|-----------------|
| Manzhuang | 3.27                                         | 5.95                                         | 43.65                        | 56.32                        | 8.16                         | 6.98 | sandy loam      |
| Laizhou   | 3.96                                         | 11.55                                        | 29.42                        | 21.78                        | 10.52                        | 7.26 | clay loam       |
| Qixia     | 1.13                                         | 12.87                                        | 18.38                        | 20.59                        | 11.38                        | 5.53 | sandy loam      |
| Yiyuan    | 1.05                                         | 20.41                                        | 16.55                        | 30.31                        | 12.39                        | 7.73 | Sandy soil      |

Note: AP: available phosphorus; AK: available potassium; SOM: soil organic matter.

**Table S2.** The environmental factors used in db-RDA analysis.

| Environmental factors |                    | CAP1   | CAP2    | r <sup>2</sup> | p_Values |
|-----------------------|--------------------|--------|---------|----------------|----------|
| Bacteria              | NH <sub>4</sub> -N | 0.7552 | 0.6555  | 0.9479         | 0.001    |
|                       | NO <sub>3</sub> -N | 0.7245 | 0.6893  | 0.8194         | 0.016    |
|                       | P                  | 0.9804 | 0.1972  | 0.934          | 0.008    |
|                       | K                  | 0.9957 | 0.0921  | 0.9797         | 0.01     |
|                       | SOM                | 0.8655 | 0.501   | 0.9919         | 0.002    |
|                       | pH                 | 0.8532 | 0.5215  | 0.9849         | 0.003    |
| Fungi                 | NH <sub>4</sub> -N | 0.9871 | −0.16   | 0.9273         | 0.005    |
|                       | NO <sub>3</sub> -N | 0.9932 | −0.1166 | 0.8581         | 0.017    |
|                       | P                  | 0.7712 | −0.6365 | 0.9277         | 0.021    |
|                       | K                  | 0.6838 | −0.7297 | 0.99           | 0.013    |
|                       | SOM                | 0.9411 | −0.338  | 0.9914         | 0.002    |
|                       | pH                 | 0.9492 | −0.3146 | 0.9978         | 0.001    |

**Table S3.** The components with peak area greater than 0.5% in the root exudates of *M. hupehensis* under different treatments.

|    | Retention<br>time | Area (%) | Possible Compounds                                                        | CAS<br>Number | Molecular<br>Formula                              |
|----|-------------------|----------|---------------------------------------------------------------------------|---------------|---------------------------------------------------|
| GR | 18.824            | 34.17    | 1,2-Benzenedicarboxylic acid, bis(2-methylpropyl) ester                   | 84-69-5       | C <sub>16</sub> H <sub>22</sub> O <sub>4</sub>    |
|    | 23.964            | 2.79     | Hexatriacontane                                                           | 630-06-8      | C <sub>36</sub> H <sub>74</sub>                   |
|    | 22.909            | 1.45     | Acetic acid, octadecyl ester                                              | 822-23-1      | C <sub>20</sub> H <sub>40</sub> O <sub>2</sub>    |
|    | 14.261            | 1.32     | 3-Acetoxybutyric acid                                                     | 52020-45-8    | C <sub>6</sub> H <sub>10</sub> O <sub>4</sub>     |
|    | 21.134            | 1.2      | Benzocycloheptano[2,3,4-I,j]isoquinoline                                  | 131179-95-8   | C <sub>20</sub> H <sub>23</sub> NO <sub>4</sub>   |
|    | 10.42             | 1.19     | Caprolactam                                                               | 105-60-2      | C <sub>6</sub> H <sub>11</sub> NO                 |
|    | 14.887            | 1.1      | Fluorene                                                                  | 86-73-7       | C <sub>13</sub> H <sub>10</sub>                   |
|    | 19.987            | 1.09     | Heneicosane                                                               | 629-94-7      | C <sub>21</sub> H <sub>44</sub>                   |
|    | 13.654            | 1.08     | 3-Deoxyglucose                                                            | 4084-27-9     | C <sub>6</sub> H <sub>10</sub> O <sub>5</sub>     |
|    | 22.25             | 1        | Oxalic acid                                                               | 144-62-7      | C <sub>2</sub> H <sub>2</sub> O <sub>4</sub>      |
|    | 20.344            | 0.99     | Cyclopropane, 1,1-dichloro-2,2-dimethyl-3-(2-methylpropyl)-               | 24577-81-9    | C <sub>9</sub> H <sub>16</sub> Cl <sub>2</sub>    |
|    | 20.215            | 0.91     | Cyclopropanecarboxylic acid,2-(1-trimethylsilylpropyn-3-yl), methyl ester | 775-56-4      | C <sub>11</sub> H <sub>18</sub> O <sub>2</sub> Si |
|    | 20.996            | 0.9      | Acetic acid, octadecyl ester                                              | 822-23-1      | C <sub>20</sub> H <sub>40</sub> O <sub>2</sub>    |
|    | 21.207            | 0.89     | tert-Hexadecanethiol                                                      | 25360-09-2    | C <sub>14</sub> H <sub>21</sub> O·.K <sup>+</sup> |
|    | 21.328            | 0.82     | 5,8,11,14-Eicosatetraynoic acid                                           | 1191-85-1     | C <sub>20</sub> H <sub>24</sub> O <sub>2</sub>    |
|    | 24.425            | 0.8      | Tetrapentacontane, 1,54-dibromo-                                          | 852228-22-9   | C <sub>54</sub> H <sub>108</sub> Br <sub>2</sub>  |

|    |        |       |                                                                    |            |                                                                  |
|----|--------|-------|--------------------------------------------------------------------|------------|------------------------------------------------------------------|
|    | 21.384 | 0.77  | Cyclopropane, 1,1-dichloro-2,2,3-triethyl-                         | 24551-90-4 | C <sub>9</sub> H <sub>16</sub> Cl <sub>2</sub>                   |
|    | 23.243 | 0.61  | Phenol, 2,2'-methylenebis[6-(1,1-dimethylethyl)-4-methyl-<br>thyl- | 93803-63-5 | C <sub>27</sub> H <sub>40</sub> O <sub>2</sub>                   |
|    | 21.255 | 0.6   | s-Triazole-3-carboxaldehyde, 5-(p-chlorophenyl)-                   | 26899-27-4 | C <sub>9</sub> H <sub>6</sub> ClN <sub>3</sub> O                 |
|    | 29.445 | 0.6   | cis-11-Eicosenamide                                                | 10436-08-5 | C <sub>20</sub> H <sub>39</sub> NO                               |
|    | 13.839 | 0.59  | Butylated Hydroxytoluene                                           | 128-37-0   | C <sub>15</sub> H <sub>24</sub> O                                |
|    | 17.022 | 0.57  | Heptadecane                                                        | 629-78-7   | C <sub>17</sub> H <sub>36</sub>                                  |
|    | 17.201 | 0.56  | Phenanthrene                                                       | 85-01-8    | C <sub>14</sub> H <sub>10</sub>                                  |
|    | 14.777 | 0.55  | Hexadecane                                                         | 544-76-3   | C <sub>16</sub> H <sub>34</sub>                                  |
|    | 20.833 | 0.53  | Phthalic acid diphenyl ester                                       | 523-31-9   | C <sub>22</sub> H <sub>18</sub> O <sub>4</sub>                   |
|    | 20.084 | 0.5   | 5,7-Dodecadiyn-1,12-diol                                           | 74602-32-7 | C <sub>12</sub> H <sub>18</sub> O <sub>2</sub>                   |
|    | 24.84  | 0.5   | DOP                                                                | 117-81-7   | C <sub>24</sub> H <sub>38</sub> O <sub>4</sub>                   |
| GC | 18.831 | 28.13 | 1,2-Benzenedicarboxylic acid, bis(2-methylpropyl) ester            | 84-69-5    | C <sub>16</sub> H <sub>22</sub> O <sub>4</sub>                   |
|    | 23.966 | 3.25  | Hexatriacontane                                                    | 630-06-8   | C <sub>36</sub> H <sub>74</sub>                                  |
|    | 20.889 | 2.58  | Tetracosane                                                        | 646-31-1   | CH <sub>3</sub> (CH <sub>2</sub> ) <sub>22</sub> CH <sub>3</sub> |
|    | 21.38  | 1.76  | Butane, 1-(2,2-dichloro-3,3-dimethylcyclopropyl)-                  | 24551-91-5 | C <sub>9</sub> H <sub>16</sub> Cl <sub>2</sub>                   |
|    | 21.133 | 1.68  | Cyclopropane, 1,1-dichloro-2,2,3-triethyl-                         | 24551-90-4 | C <sub>9</sub> H <sub>16</sub> Cl <sub>2</sub>                   |
|    | 23.151 | 1.15  | Triphenyl phosphate                                                | 115-86-6   | C <sub>18</sub> H <sub>15</sub> O <sub>4</sub> P                 |
|    | 22.555 | 1.06  | 5,5,10,10-Tetrachlorotricyclo [7.1.0.0(4,6)] decane                | 62990-21-0 | C <sub>10</sub> H <sub>12</sub> Cl <sub>4</sub>                  |
|    | 24.238 | 0.93  | 1-Penten-4-yn-3-ol, 1-phenyl-                                      | 14604-31-0 | C <sub>11</sub> H <sub>10</sub> O                                |
|    | 19.988 | 0.91  | Heneicosane                                                        | 629-94-7   | C <sub>21</sub> H <sub>44</sub>                                  |
|    | 24.84  | 0.91  | DOP                                                                | 117-81-7   | C <sub>24</sub> H <sub>38</sub> O <sub>4</sub>                   |
|    | 21.216 | 0.89  | 3,7,11,15-Tetramethyl-hexadecanol, trimethylsilyl ether            | 645-72-7   | C <sub>20</sub> H <sub>42</sub> O                                |
|    | 20.342 | 0.83  | 5,7-Dodecadiyn-1,12-diol                                           | 74602-32-7 | C <sub>12</sub> H <sub>18</sub> O <sub>2</sub>                   |
|    | 20.213 | 0.73  | 1-Heptene, 5,7,7,7-tetrachloro-                                    | 51287-99-1 | C <sub>7</sub> H <sub>10</sub> Cl <sub>4</sub>                   |
|    | 10.404 | 0.66  | Caprolactam                                                        | 105-60-2   | C <sub>6</sub> H <sub>11</sub> NO                                |
|    | 22.902 | 0.59  | 1-Hexadecanol, acetate                                             | 629-70-9   | C <sub>18</sub> H <sub>36</sub> O <sub>2</sub>                   |
|    | 14.884 | 0.54  | Fluorene                                                           | 86-73-7    | C <sub>13</sub> H <sub>10</sub>                                  |
|    | 17.021 | 0.53  | Heptadecane                                                        | 629-78-7   | C <sub>17</sub> H <sub>36</sub>                                  |
|    | 13.656 | 0.52  | 3-Deoxyglucose                                                     | 4084-27-9  | C <sub>6</sub> H <sub>10</sub> O <sub>5</sub>                    |
|    | 13.837 | 0.51  | Butylated Hydroxytoluene                                           | 128-37-0   | C <sub>15</sub> H <sub>24</sub> O                                |
| GT | 18.819 | 41.82 | 1,2-Benzenedicarboxylic acid, bis(2-methylpropyl) ester            | 84-69-5    | C <sub>16</sub> H <sub>22</sub> O <sub>4</sub>                   |
|    | 20.894 | 2.96  | Tetracosane                                                        | 646-31-1   | C <sub>24</sub> H <sub>50</sub>                                  |
|    | 14.272 | 2.59  | 3-Acetoxybutyric acid                                              | 52020-45-8 | C <sub>6</sub> H <sub>10</sub> O <sub>4</sub>                    |
|    | 14.892 | 2.4   | Fluorene                                                           | 86-73-7    | C <sub>13</sub> H <sub>10</sub>                                  |
|    | 10.415 | 2.26  | Caprolactam                                                        | 105-60-2   | C <sub>6</sub> H <sub>11</sub> NO                                |
|    | 13.667 | 1.93  | 3-Deoxyglucose                                                     | 4084-27-9  | C <sub>6</sub> H <sub>10</sub> O <sub>5</sub>                    |
|    | 13.787 | 1.92  | Phenol, 2,4-bis(1,1-dimethylethyl)-                                | 96-76-4    | C <sub>14</sub> H <sub>22</sub> O                                |
|    | 19.047 | 1.74  | Heneicosane                                                        | 629-94-7   | C <sub>21</sub> H <sub>44</sub>                                  |
|    | 29.676 | 1.54  | Hexatriacontane                                                    | 630-06-8   | C <sub>36</sub> H <sub>74</sub>                                  |
|    | 14.151 | 1.44  | 1,1,3,3-Tetramethyl-1,3-disilacyclopentane                         | 5927-28-6  | C <sub>7</sub> H <sub>16</sub> Si <sub>2</sub>                   |
|    | 17.025 | 1.2   | Heptadecane                                                        | 629-78-7   | C <sub>17</sub> H <sub>36</sub>                                  |
|    | 14.781 | 1.16  | Hexadecane                                                         | 544-76-3   | C <sub>16</sub> H <sub>34</sub>                                  |
|    | 17.209 | 1.12  | Phenanthrene                                                       | 85-01-8    | C <sub>14</sub> H <sub>10</sub>                                  |
|    | 10.201 | 0.95  | Benzothiazole                                                      | 273-13-2   | C <sub>6</sub> H <sub>4</sub> N <sub>2</sub> S                   |
|    | 11.17  | 0.75  | Cyclohexasiloxane, dodecamethyl-                                   | 540-97-6   | C <sub>12</sub> H <sub>36</sub> O <sub>6</sub> Si <sub>6</sub>   |
|    | 13.231 | 0.62  | Biphenylene                                                        | 259-79-0   | C <sub>12</sub> H <sub>8</sub>                                   |
|    | 12.272 | 0.57  | Tetradecane                                                        | 629-59-4   | C <sub>14</sub> H <sub>30</sub>                                  |
|    | 14.092 | 0.57  | Dibenzofuran                                                       | 132-64-9   | C <sub>12</sub> H <sub>8</sub> O                                 |
|    | 15.345 | 0.54  | Dibenzofuran, 4-methyl-                                            | 7320-53-8  | C <sub>13</sub> H <sub>10</sub> O                                |
|    | 15.509 | 0.54  | Cyclooctasiloxane, hexadecamethyl-                                 | 556-68-3   | C <sub>16</sub> H <sub>48</sub> O <sub>8</sub> Si <sub>8</sub>   |

9.244

0.53

N-Nitroso-2-methylthiazolidine

70629-19-5

C<sub>4</sub>H<sub>8</sub>N<sub>2</sub>OS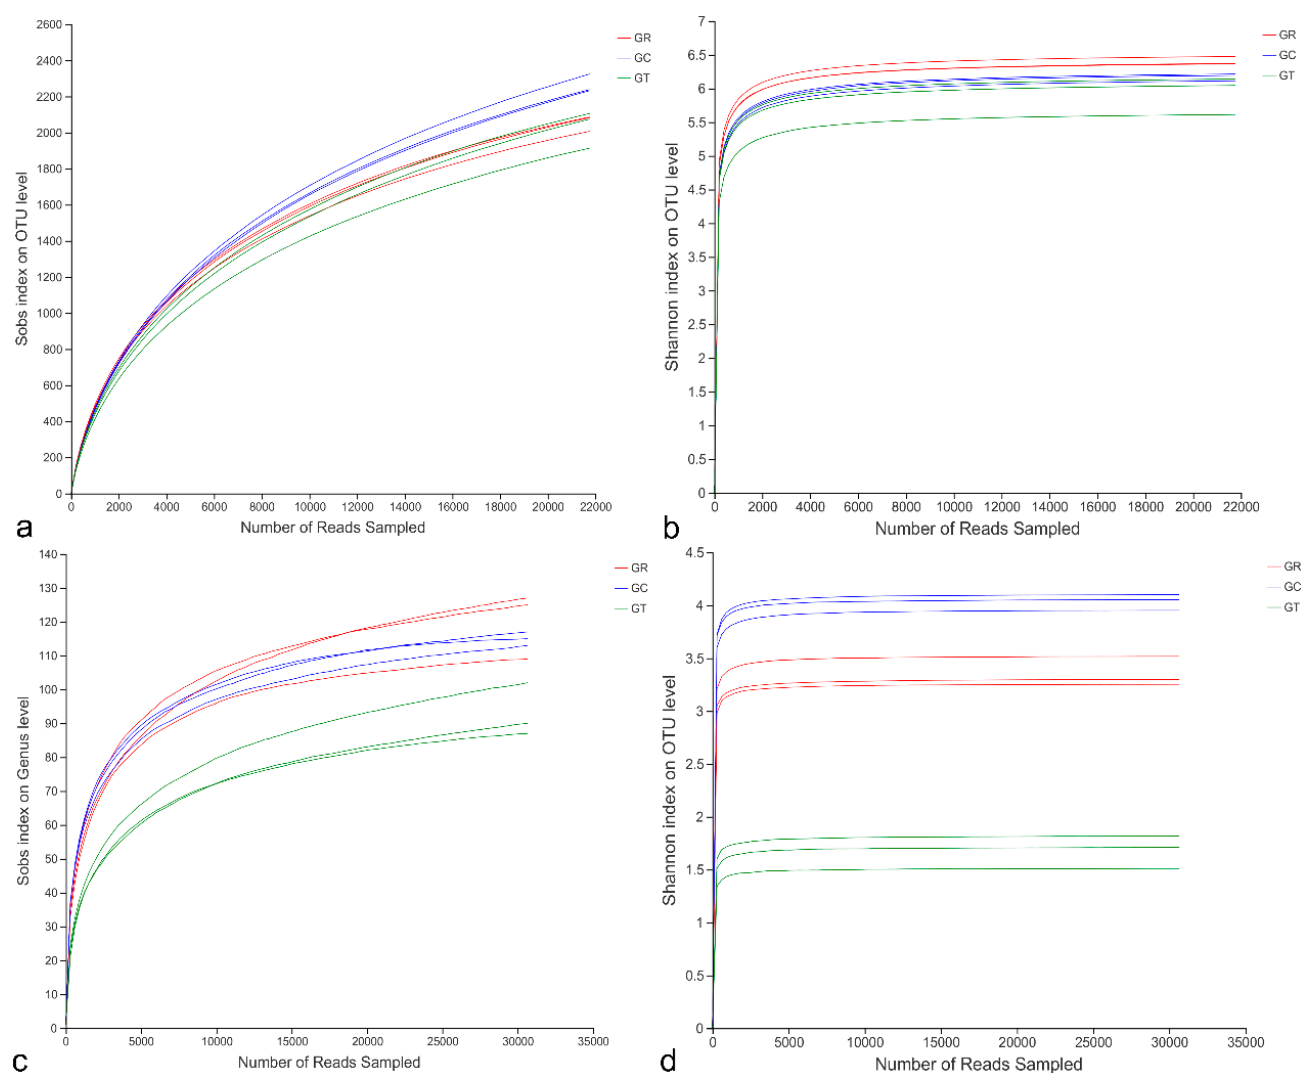

**Figure S1.** Dilution curve at the OTU level. Sobs index of bacteria (a) and fungi (c); Shannon index of bacteria (b) and fungi (d). GR, control replant soil in the greenhouse experiment; GC, replant soil with blank carrier in the greenhouse experiment; GT, replant soil with 6S-2 fertilizer in the greenhouse experiment.

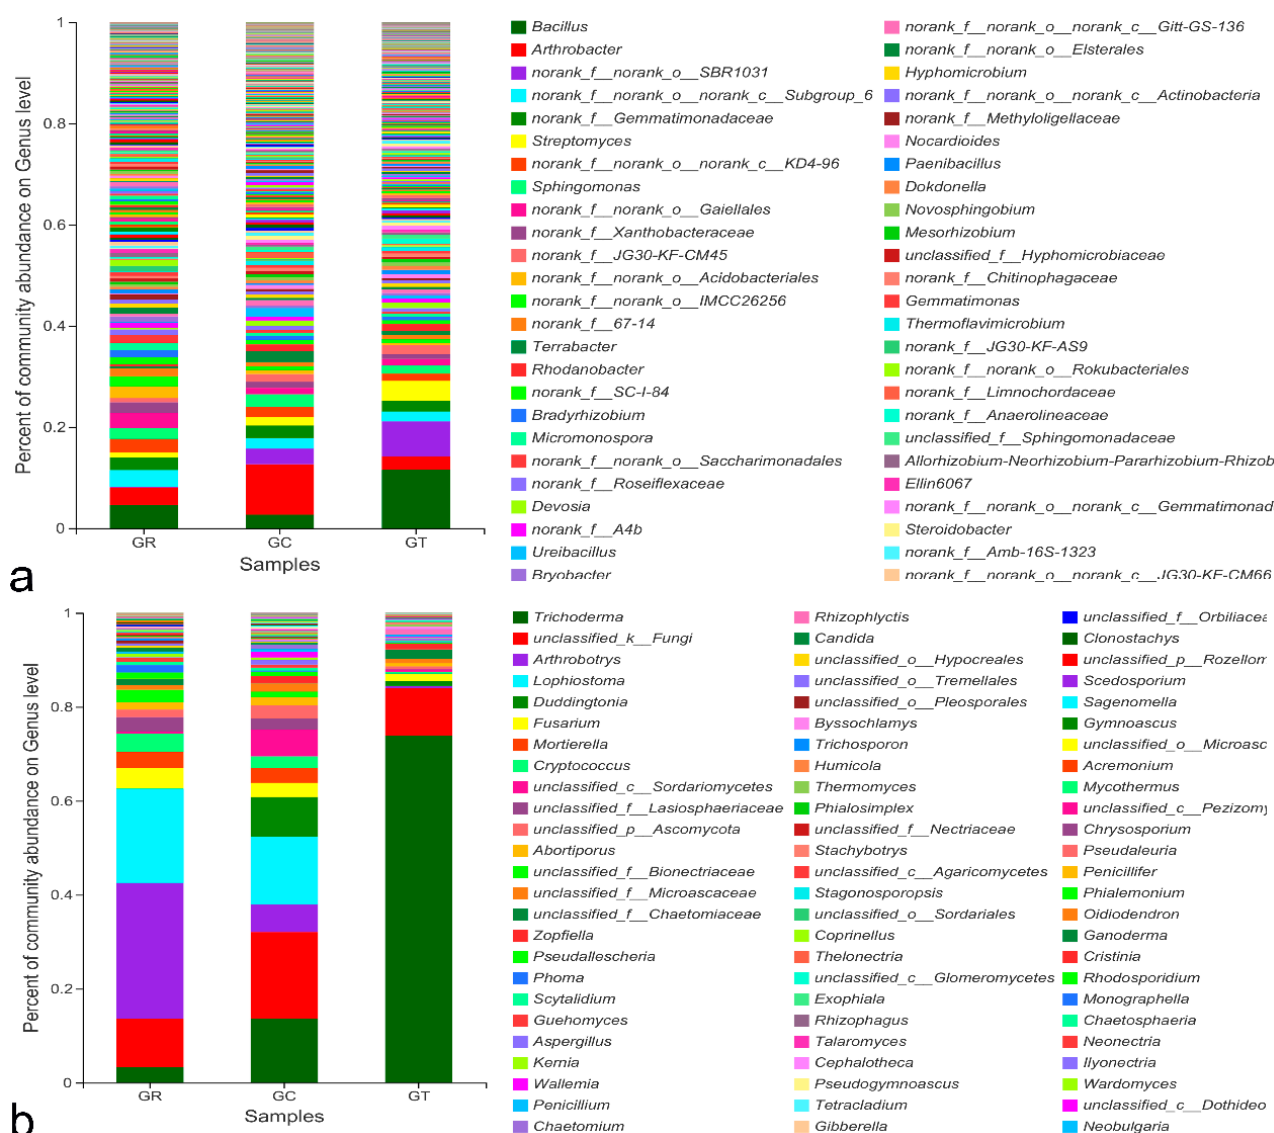

**Figure S2.** Species compositions of different treatments at the genus level for bacteria (a) and fungi (b). GR, control replant soil in the greenhouse experiment; GC, replant soil with blank carrier in the greenhouse experiment; GT, replant soil with 6S-2 fertilizer in the greenhouse experiment.

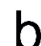

**Figure S3.** Circos diagrams of the relative abundance and distribution of soil bacteria (a) and fungi (b) at the genus level for different groups. The width of the bar indicates the relative abundance of the genus. GR, control replant soil in the greenhouse experiment; GC, replant soil with blank carrier in the greenhouse experiment; GT, replant soil with 6S-2 fertilizer in the greenhouse experiment.

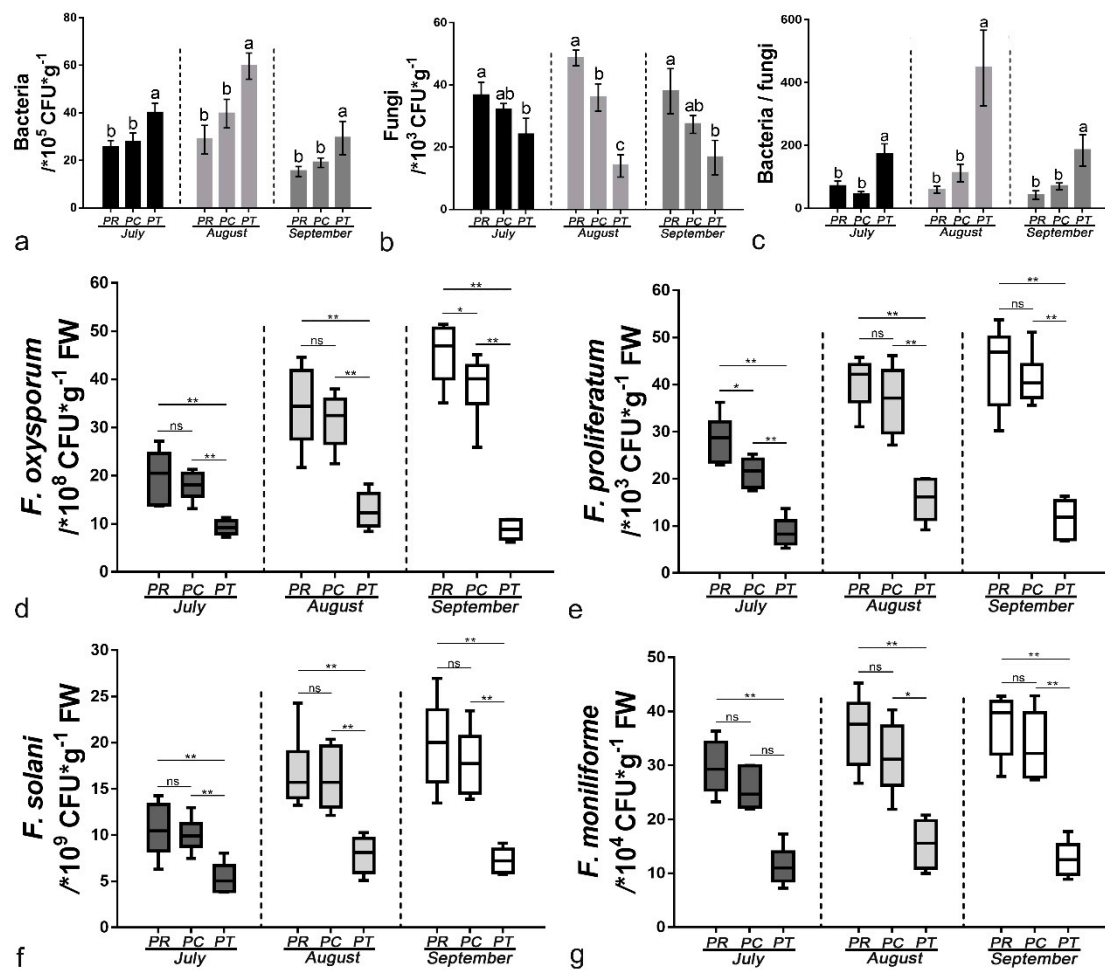

**Figure S4.** The number of culturable bacteria (a) and fungi (b) and the ratio of bacteria to fungi (c) in the pot experiment. Real-time fluorescence quantification of *F. oxysporum* (d), *F. proliferatum* (e), *F. solani* (f), and *F. moniliforme* (g) in the pot experiment. PR, control replant soil in pots; PC: replant soil with blank carrier in pots; PT: replant soil with 6S-2 fertilizer in pots. The significance of differences between groups was determined by Duncan's new multiple range test and Student's *t*-test. Different lowercase letters indicate a significant difference at  $P < 0.05$  by Duncan's new multiple range test. Within a given measurement, \* $P < 0.05$ ; \*\* $P < 0.01$ ; NS, no significant difference (Student's *t*-test).

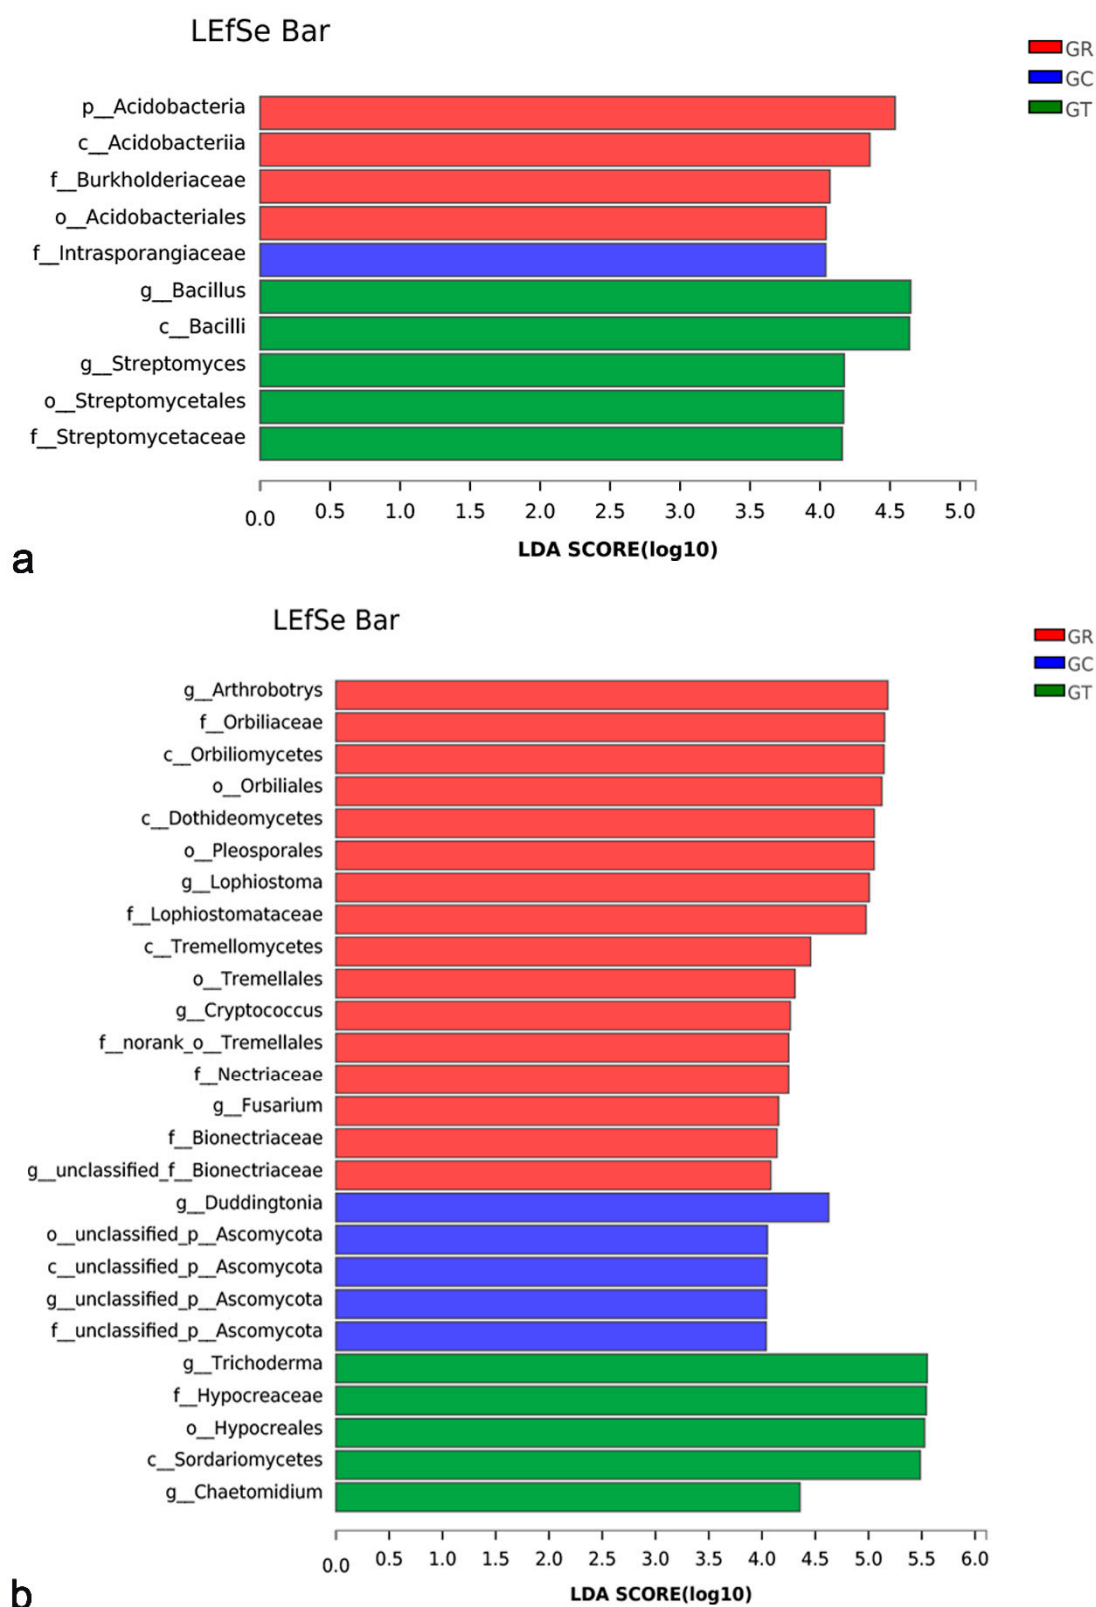

**Figure S5.** LDA scores of enriched taxa from Figure 4 (g and h). Indicator bacteria (a) and fungi (b) with LDA scores of 4 or greater in communities of the three treatment groups. GR (red), control replant soil in the greenhouse experiment; GC (blue), replant soil with blank carrier in the greenhouse experiment; GT (green), replant soil with 6S-2 fertilizer in the greenhouse experiment.



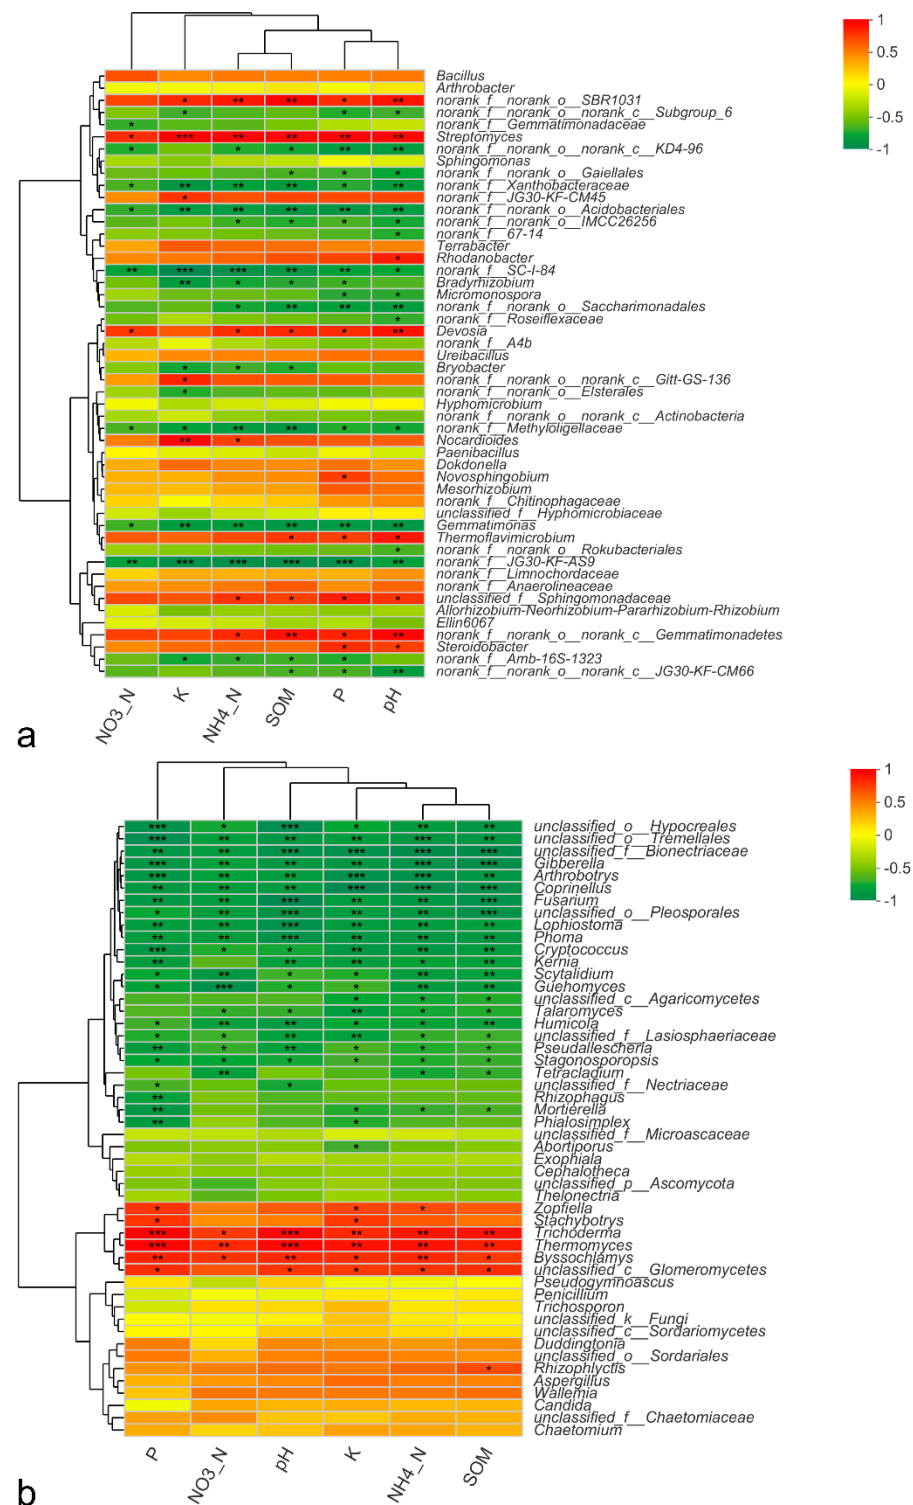

**Figure S6.** Correlation heatmap of the top fifty bacterial (a) and fungal (b) genera with environmental factors. The x and y axes are environmental factors and genera. The legend shows the color range of the R values. \*P < 0.05.



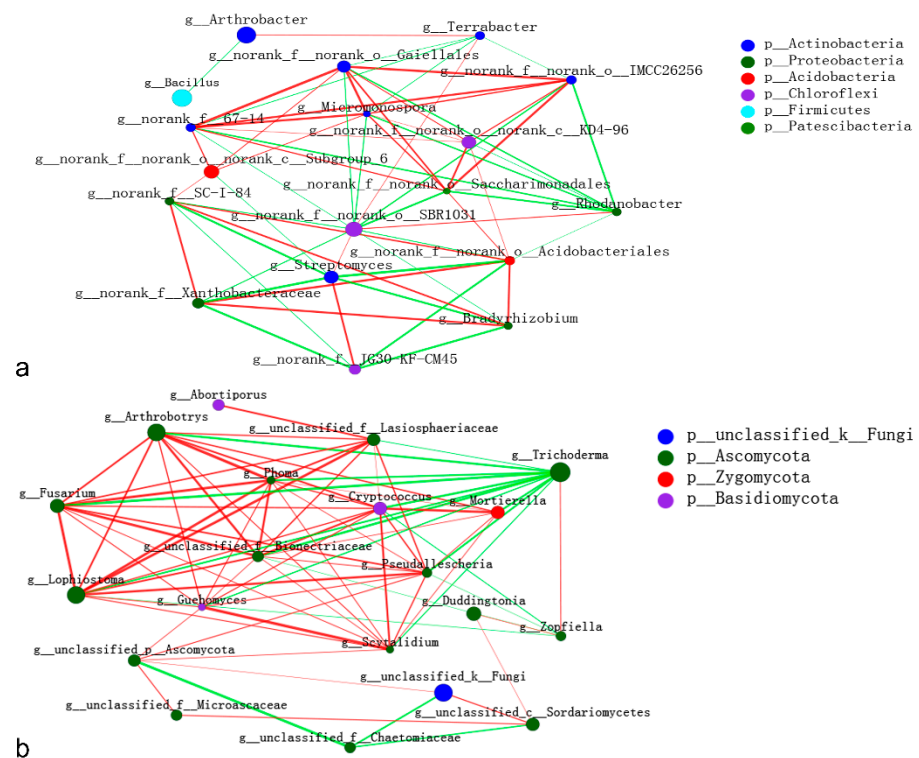

**Figure S7.** Single-way correlation network among the top twenty bacterial (a) and fungal (b) genera. Node size is proportional to genus abundance. Node color corresponds to family taxonomic classification. Edge colors represent positive (green) and negative (red) correlations, and the edge thickness is equivalent to the correlation value.

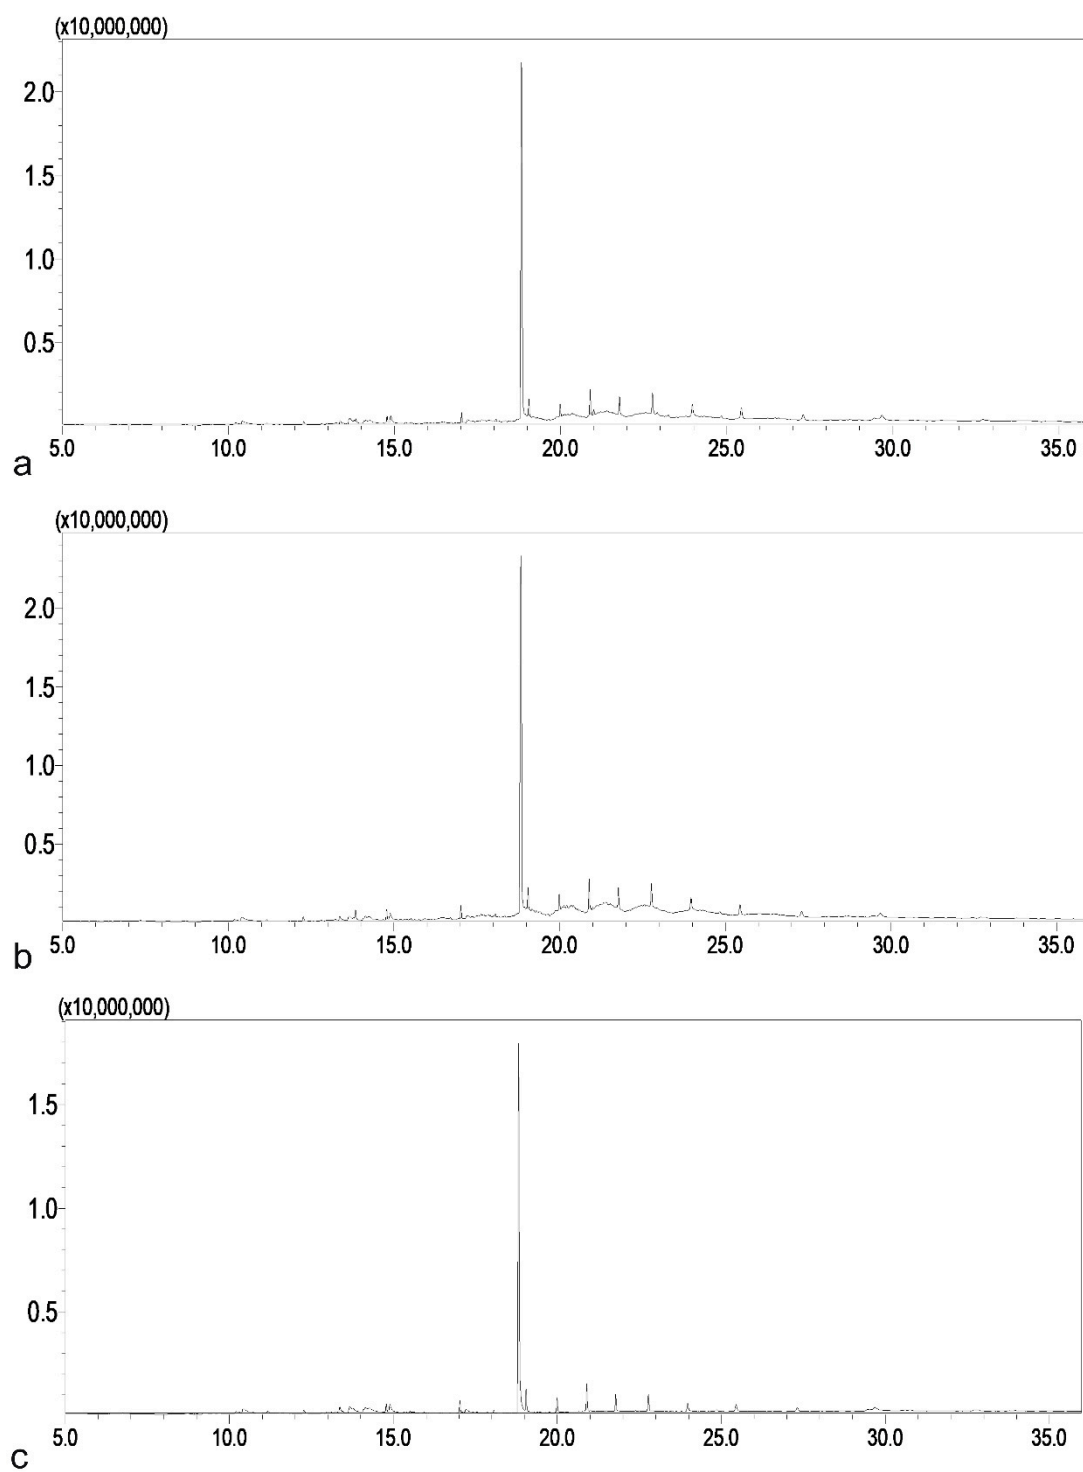

**Figure S8.** The spectrum of exudates from roots of *M. hupehensis* seedlings under different treatments. The x and y axes axis are time and contents.
